# Supplementary material for: Acute Kidney Injury in Elderly Patients in Saudi Arabia: Retrospective Study
Source: Research Square preprint supplement (doi:10.21203/rs.3.rs-7093452/v1), 2025-08-25
Supplement: Supplementary file 1 [file 4ec554c03e1466b01384f2c6.docx]

**Acute Kidney Injury in Elderly Patients** **in Saudi Arabia: Retrospective Study**

Abrar F. Alshehri 1,*, Nouf Alotaibi 1, Abdulaziz Alhossan 2

Affiliation 1; Department of Pharmaceutical Services, College of Pharmacy, Umm Al-Qura University, Makkah, Saudi Arabia

Affiliation 2; Department of Clinical Pharmacy, College of Pharmacy, King Saud University, Riyadh, Saudi Arabia

*Correspondence: **Abrar Fayez Alshehri, Pharm.D, MSc, BCPS, BCCP.**

Lecturer in Department of Pharmaceutical Services, College of Pharmacy, Umm Al-Qura University, Makkah, Saudia Arabia. P.O. Box: 13578 Zip Code: 21955.

Email: [afashahri@uqu.edu.sa](mailto:afashahri@uqu.edu.sa); [abrar.f.alshehri@gmail.com](mailto:abrar.f.alshehri@gmail.com)

Mobile Number: 00966563693616

ORCID: [0000-0001-6311-3721](https://orcid.org/0000-0001-6311-3721)

Supplementary Figures

Figure S1. Percentage of risk factors of acute kidney injury in elderly patients. CKD: Chronic Kidney Disease, IHD: Ischemic Heart Disease, BPH: Benign Prostatic Hypertrophy, PHTN: Pulmonary hypertension, VTE: Venous Thromboembolism, PAD: Peripheral Arterial Disease.

**(a)**

**(b)**

**(c)**

Figure S2. Reason categories of acute kidney injury in the elderly: (a) Number of overall causes of acute kidney injury in elderly patients. (b) Number of causes of hospital-acquired acute kidney injury in elderly patients. (c) Number of causes of community acute kidney injury in elderly patients.
